# Supplementary material for: Detection of Functional Modes in Protein Dynamics
Source: PLOS journal article supplement (doi:10.1371/journal.pcbi.1000480), 2009-08-27
Supplement: S1 (10.1371/journal.pcbi.1000480.s001) [file journal.pcbi.1000480.s001]

## Text S1

### Maximization of the absolute value of $R$

Here we derive eqs. (5) of the main manuscript that maximize the Pearson coefficient  $R$ . Without loss of generality let us assume that the variance of  $f(t)$  equals unity. Then,  $R$  reads

$$R = \frac{\text{cov}(f, p_a)}{\sigma_a} = \frac{\sum_{i=1}^d \alpha_i \text{cov}(f, p_i)}{[\sum_{i,j=1}^d \alpha_i \alpha_j \text{cov}(p_i, p_j)]^{1/2}} \quad (1)$$

Note that  $R$  is invariant to a scaling of all coefficients  $\alpha_i$  by a constant and hence,  $\sum_i \alpha_i^2$  must not be treated as a constraint for the optimization. The maximum of the absolute value of  $R$  can be found by maximizing  $R^2$ . For compact notation, the abbreviations  $c_i := \text{cov}(f, p_i)$  and  $\gamma_{ij} := \text{cov}(p_i, p_j)$  are introduced. Then, the square of the correlation coefficient reads  $R^2 = [\sum_{i=1}^d \alpha_i c_i]^2 / \sum_{i,j=1}^d \alpha_i \alpha_j \gamma_{ij}$ , and its derivative with respect to  $\alpha_\ell$  is

$$\frac{\partial[R^2]}{\partial \alpha_\ell} = \frac{2 \sum_i \alpha_i c_i}{(\sum_{i,j} \alpha_i \alpha_j \gamma_{ij})^2} \left[ c_\ell \left( \sum_{ij} \alpha_i \alpha_j \gamma_{ij} \right) - \left( \sum_i \alpha_i c_i \right) \left( \sum_i \alpha_i \gamma_{i\ell} \right) \right]. \quad (2)$$

$R^2$  is maximized by setting all  $d$  derivatives of  $R^2$  to equal zero.  $\partial[R^2]/\partial \alpha_\ell = 0$  is satisfied for all  $\ell$  if the  $\alpha_i$  obey

$$\kappa \sum_i \alpha_i \gamma_{i\ell} = c_\ell, \quad \ell = 1, \dots, d. \quad (3)$$

Here,  $\kappa$  is an arbitrary constant which can be used to normalize the collective vector  $\mathbf{a}$  (such that  $\sum_i \alpha_i^2 = 1$ ), but which does not affect  $R$ . For  $\kappa = 1$ , eqs. (3) are equivalent to eqs. (5) of the main manuscript. To verify that the set of  $\alpha_i$  computed via eqs. (3) defines a local maximum in  $R^2$ , the eigenvalues of the Hessian  $H_{k\ell}$  of  $R^2$  must be non-positive at the maximum. A straightforward calculation yields

$$H_{k\ell}|_{\text{max}} = \frac{\partial^2[R^2]}{\partial \alpha_k \partial \alpha_\ell} \Big|_{\text{max}} = -2\kappa^2 \left[ \gamma_{k\ell} - \frac{c_k c_\ell}{\sum_i \kappa \alpha_i c_i} \right], \quad (4)$$

where  $|_{\text{max}}$  indicates that the  $\alpha_i$  were computed according to eqs. (3). The eigenvalues of  $H_{k\ell}|_{\text{max}}$  can be computed numerically which has been implemented into the FMA tool. For the examples presented in this study all eigenvalues of  $H_{k\ell}|_{\text{max}}$  were negative, always with the exception of one zero eigenvalue corresponding to the scaling of all  $\alpha_i$  by a scalar factor. This finding is expected because  $R$  is invariant to a scaling of the coefficients  $\alpha_i$ .

### Construction of best linear model $m_f(t)$

Let  $D = \langle [f - m_f]^2 \rangle$  denote the MSD between the functional quantity  $f(t)$  and its model  $m_f(t) = \langle f \rangle + \sum_{i=1}^d \beta_i (p_i(t) - \langle p_i \rangle)$ .  $D$  is minimized with respect to the  $d$  parameters  $\beta_i$  by setting the  $d$  partial derivatives  $\partial D / \partial \beta_\ell$  to zero, immediately yielding eqs. (7) of the main manuscript. It is straightforward to show that the second derivatives of  $D$  are twice the elements of the covariance matrix of the principal

components  $p_i(t)$ , i.e.,  $\partial^2 D / \partial \beta_\ell \partial \beta_k = 2\text{cov}(p_\ell, p_k)$ . Because covariance matrices are positive semidefinite [1], the set of  $\beta_i$  defined by eqs. (7) of the main manuscript correspond to a local minimum of  $D$ .

## References

1. Mardia KV, Kent JT, Bibby JM (1979) Multivariate Analysis. San Diego: Academic Press.
